# Supplementary material for: Sensitive protein misfolding cyclic amplification of sporadic Creutzfeldt–Jakob disease prions is strongly seed and substrate dependent
Source: Springer Nature journal article supplement (doi:10.1038/s41598-021-83630-1), 2021-02-18

## SUPPLEMENTARY INFORMATION

### **Sensitive Protein Misfolding Cyclic Amplification of Sporadic Creutzfeldt-Jakob disease Prions is Strongly Seed and Substrate Dependent**

Maxime B elondrade<sup>1</sup>, Simon Nicot<sup>1</sup>, Charly Mayran<sup>1</sup>, Lilian Bruy ere-Ostells<sup>1</sup>, Florian Almela<sup>1</sup>, Michele A. Di Bari<sup>2</sup>, Etienne Levavasseur<sup>3</sup>, Joel C. Watts<sup>4</sup>, Chantal Fournier-Wirth<sup>1</sup>, Sylvain Lehmann<sup>5</sup>, St ephane Haik<sup>3</sup>, Romolo Nonno<sup>2</sup>, Daisy Bougard<sup>1\*</sup>

<sup>1</sup>Pathogenesis and control of chronic infections, Universit e de Montpellier, Etablissement Fran ais du Sang, Inserm, Montpellier, France

<sup>2</sup>Department of Food Safety, Nutrition and Veterinary Public Health, Istituto Superiore di Sanita, Rome, Italy

<sup>3</sup>Inserm U 1127, CNRS UMR 7225, Sorbonne Universit es, UPMC Universit e Paris 06 UMR S 1127, Institut du Cerveau et de la Moelle  pini ere, Paris, France

<sup>4</sup>Tanz Centre for Research in Neurodegenerative Diseases and Department of Biochemistry, University of Toronto, Toronto, Canada

<sup>5</sup>IRMB, INM, Univ Montpellier, INSERM, CHU Montpellier, (LBPC-PPC), Montpellier, France

\*Address correspondence to Daisy Bougard, [daisy.bougard@efs.sante.fr](mailto:daisy.bougard@efs.sante.fr).

**Supplementary Table S1: Summary of patients included in the PMCA brain study**

| <b>Id</b> | <b>Classification</b> | <b>Gender</b> | <b>Age</b> | <b>Diagnosis</b> | <b>Disease duration</b> |
|-----------|-----------------------|---------------|------------|------------------|-------------------------|
| #1        | MM1                   | F             | 78         | Definite sCJD    | 3 months                |
| #2        | MM1                   | F             | 65         | Definite sCJD    | 3 months                |
| #3        | MM1                   | F             | 52         | Definite sCJD    | 2 months                |
| #4        | MM2                   | M             | 67         | Definite sCJD    | 17 months               |
| #5        | MM2                   | M             | 68         | Definite sCJD    | 13 months               |
| #6        | MV1                   | M             | 62         | Definite sCJD    | 17 months               |
| #7        | MV1                   | M             | 74         | Definite sCJD    | 2 months                |
| #8        | MV2                   | F             | 58         | Definite sCJD    | 10 months               |
| #9        | MV2                   | F             | 64         | Definite sCJD    | 16 months               |
| #10       | VV1                   | M             | 63         | Definite sCJD    | 5 months                |
| #11       | VV1                   | F             | 33         | Definite sCJD    | 19 months               |
| #12       | VV2                   | F             | 76         | Definite sCJD    | 7 months                |
| #13       | VV2                   | M             | 60         | Definite sCJD    | 6 months                |
| #14       | VV2                   | M             | 75         | Definite sCJD    | 4 months                |
| #15       | MM2B                  | na            | na         | Definite vCJD    | na                      |

**Supplementary Table S2: Summary of patients included in the CSF study**

| <b>Id</b> | <b>Classification</b> | <b>Gender</b> | <b>Age</b> | <b>Diagnosis</b> | <b>CSF 14-3-3</b> |
|-----------|-----------------------|---------------|------------|------------------|-------------------|
| §1        | MM                    | M             | 86         | Probable sCJD    | Positive          |
| §2        | MM                    | F             | 75         | Probable sCJD    | Positive          |
| §3        | MM1                   | M             | 67         | Definite sCJD    | Positive          |
| §4        | MM1                   | M             | 68         | Definite sCJD    | Positive          |
| §5        | MM2                   | M             | 65         | Definite sCJD    | Positive          |
| §6        | VV2                   | M             | 77         | Definite sCJD    | Positive          |
| §7        | VV                    | F             | 70         | Probable sCJD    | Positive          |
| §8        | VV                    | M             | 79         | Probable sCJD    | Positive          |
| §9        | MM2B                  | F             | 27         | Definite vCJD    | Negative          |

**Supplementary Figure S1: PMCA amplification of sCJD MM1 in TgMet, BV and TgBV**

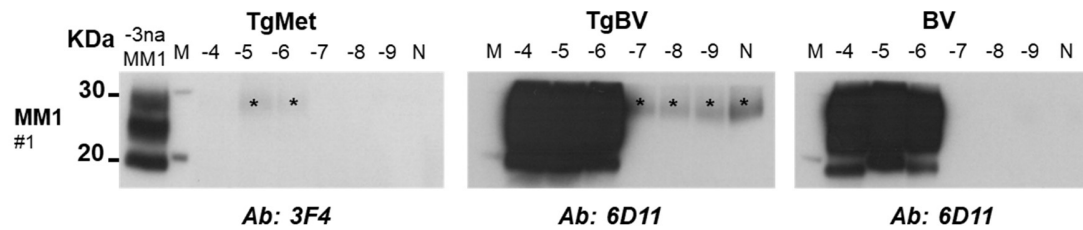

Serial dilutions from  $10^{-4}$  to  $10^{-9}$  of the MM1 subtype sCJD homogenate (#1) were amplified using TgMet, TgBV or BV substrates. After 4 rounds of PMCA, the PrP<sup>TSE</sup> signal was analyzed by western blot after proteinase K digestion using 3F4 or 6D11 antibodies as indicated. For each sample, 20  $\mu$ L of the product were loaded onto the gel. -3na MM1 refers to non-amplified material (no PMCA) obtained from the  $10^{-3}$  dilution (w/v) of the initial infectious brain sample of the MM1 subtype sCJD patient #1. N refers to unseeded substrate amplified in the same conditions. The asterisk indicates a faint signal from incomplete PrP<sup>C</sup> digestion. M indicates the typical molecular mass of PrP<sup>res</sup> in the range of 20 to 30 kDa.

Supplementary uncropped original blots

Figure 1

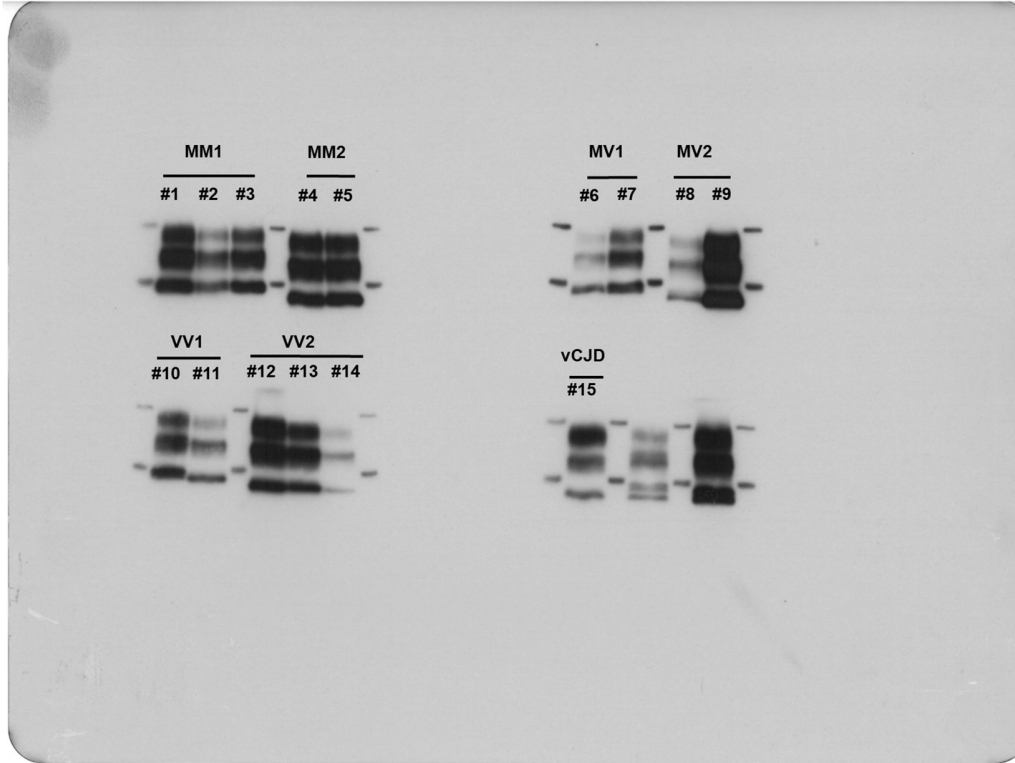

Figure 2

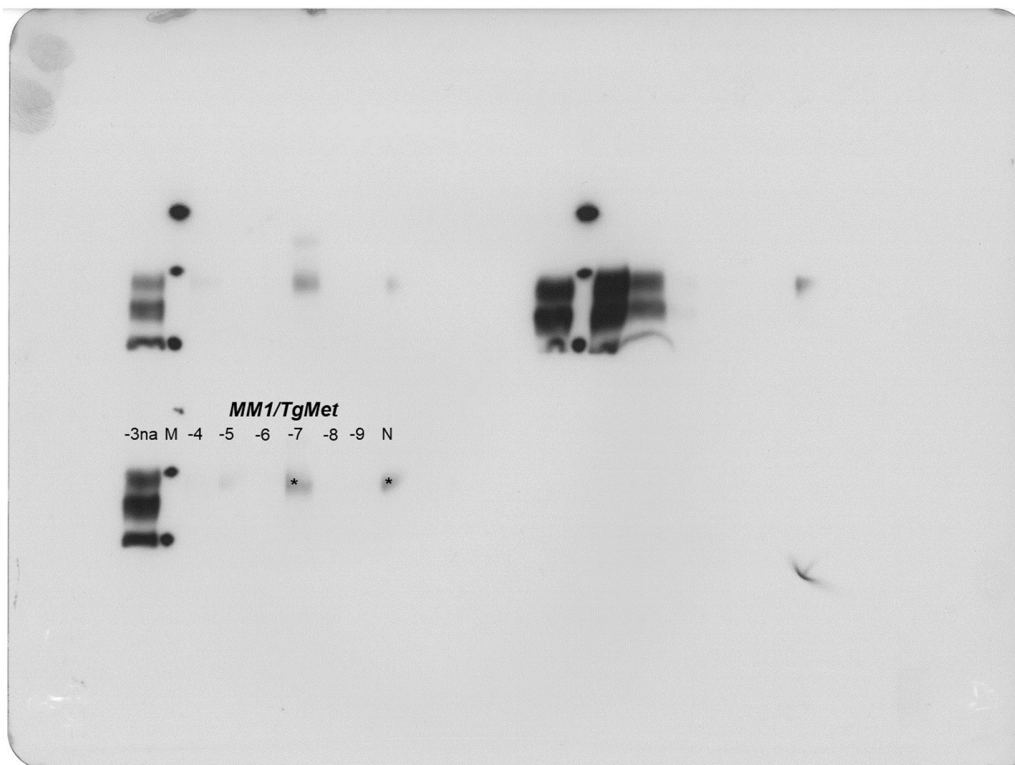

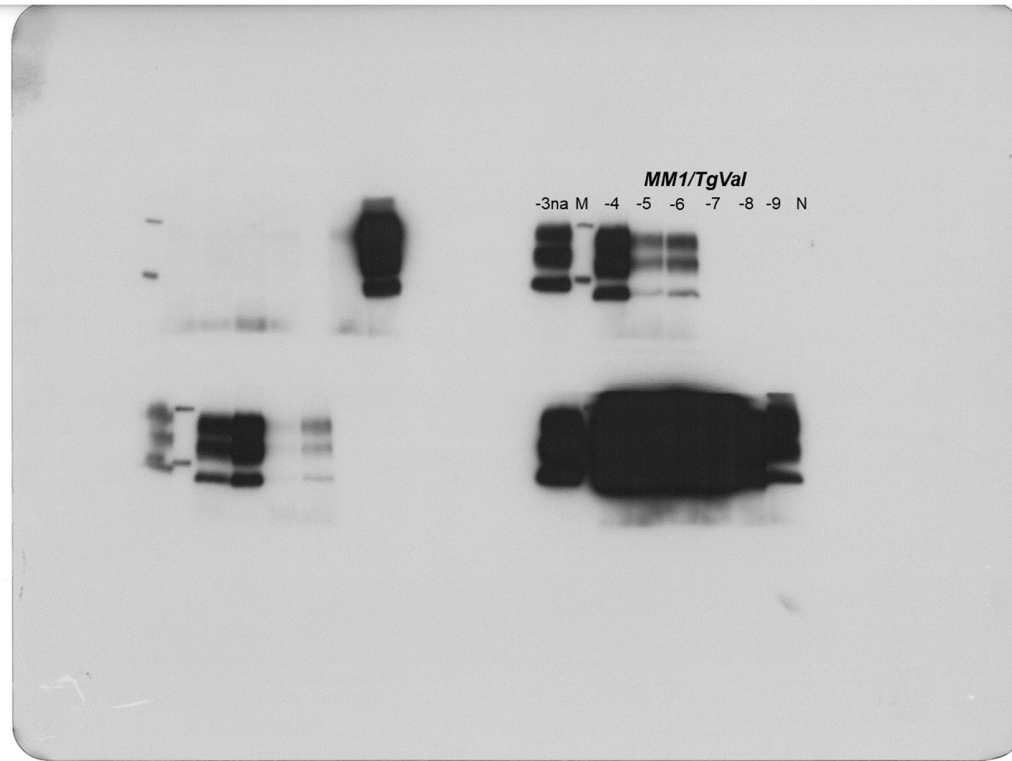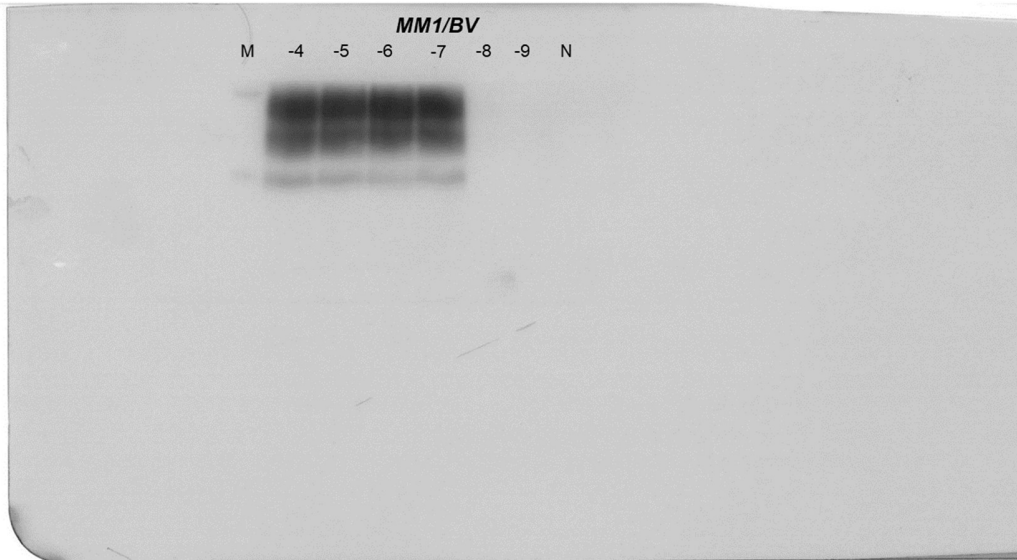

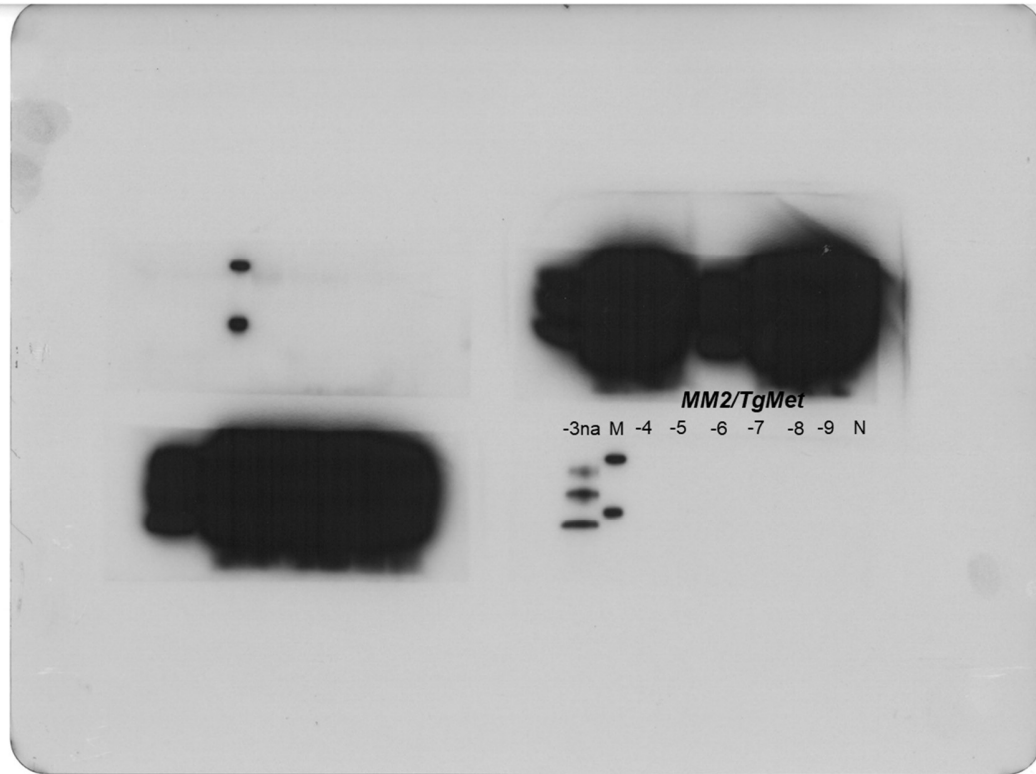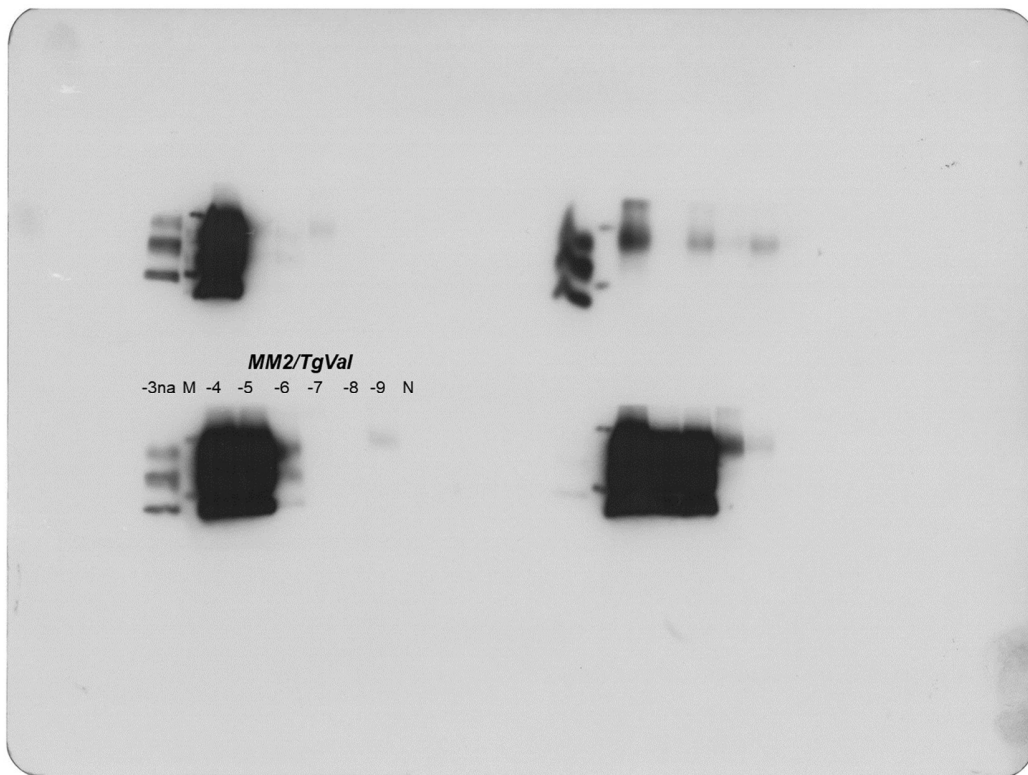

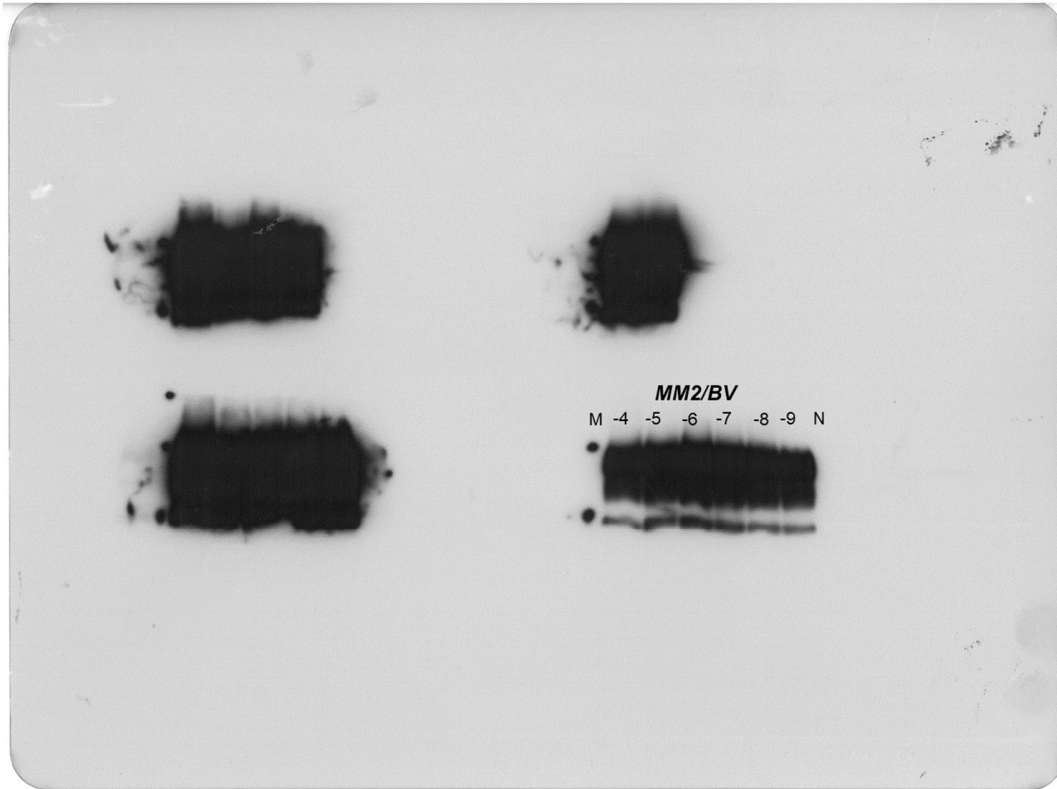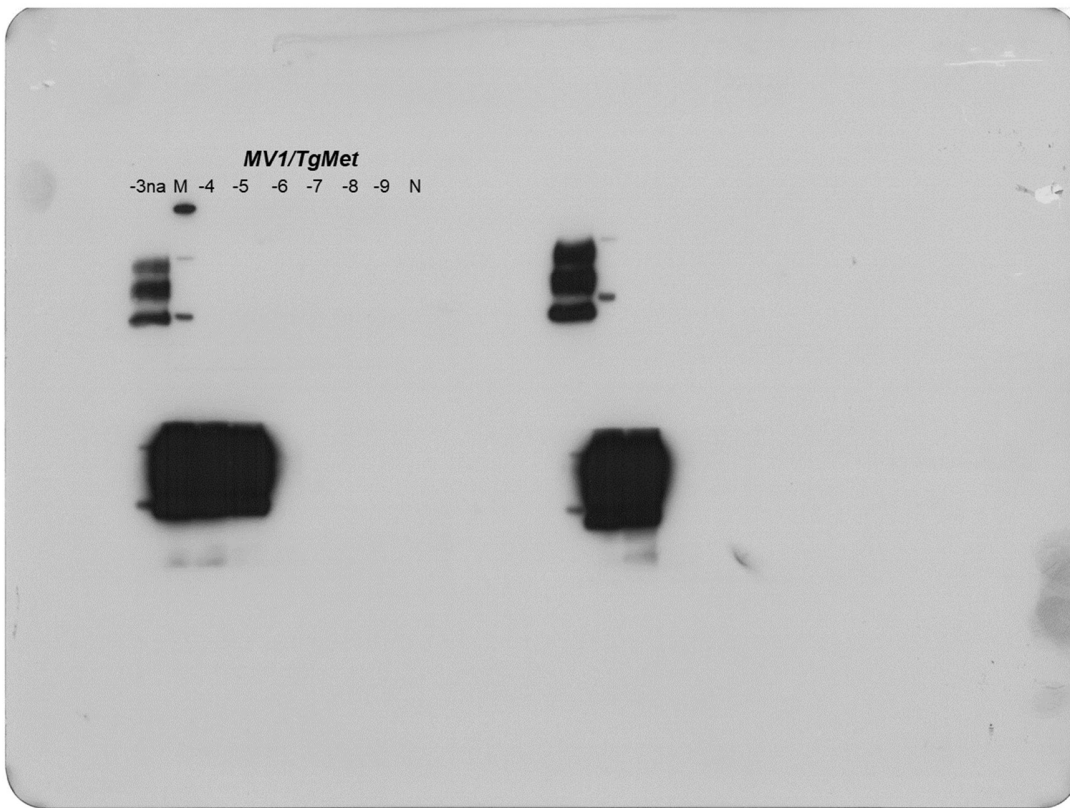



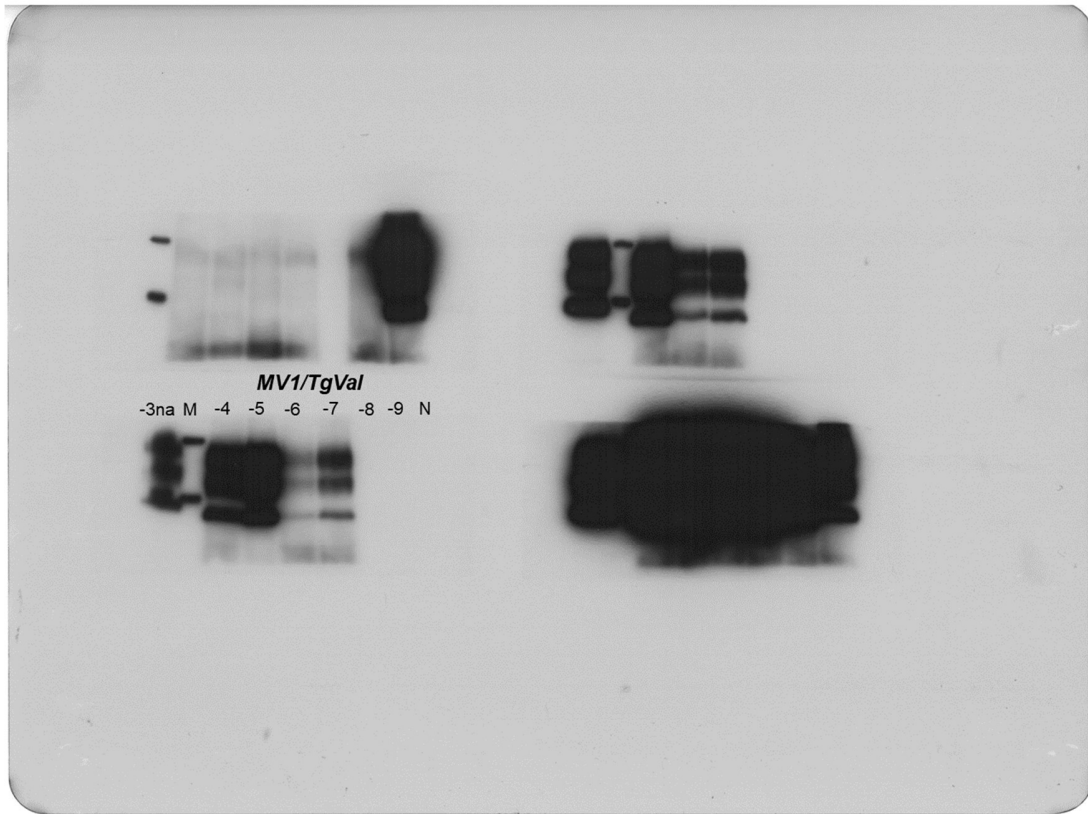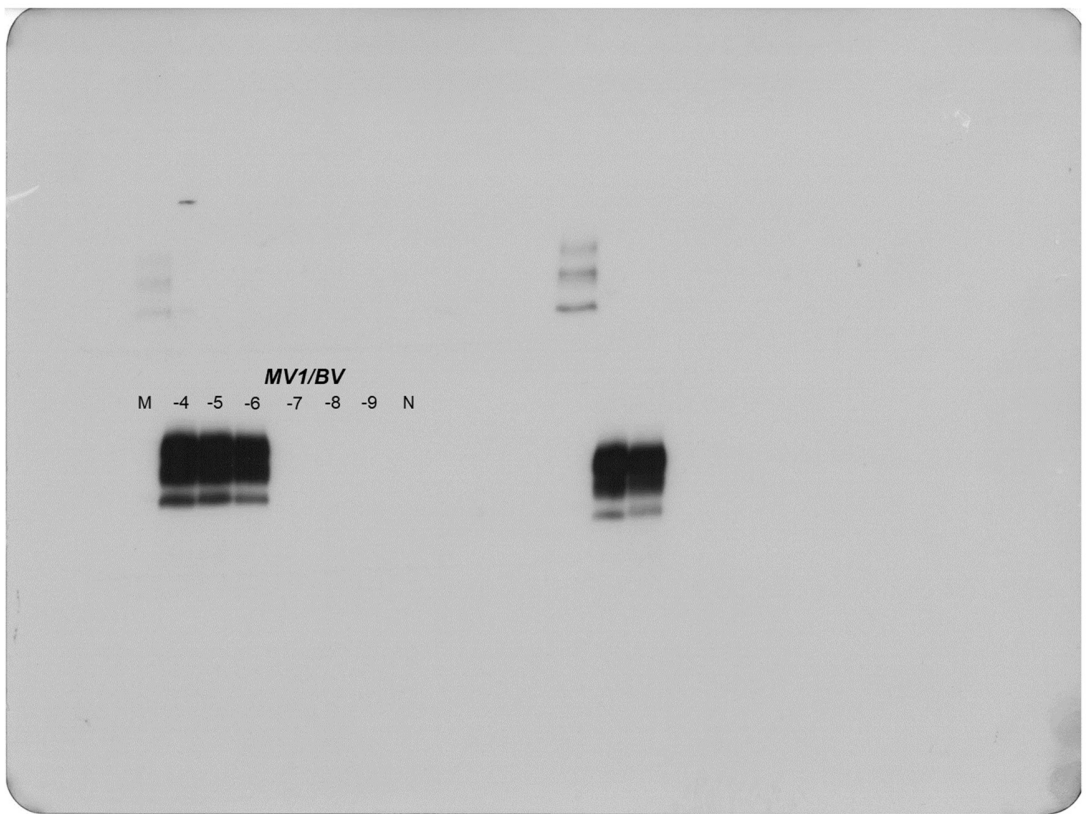

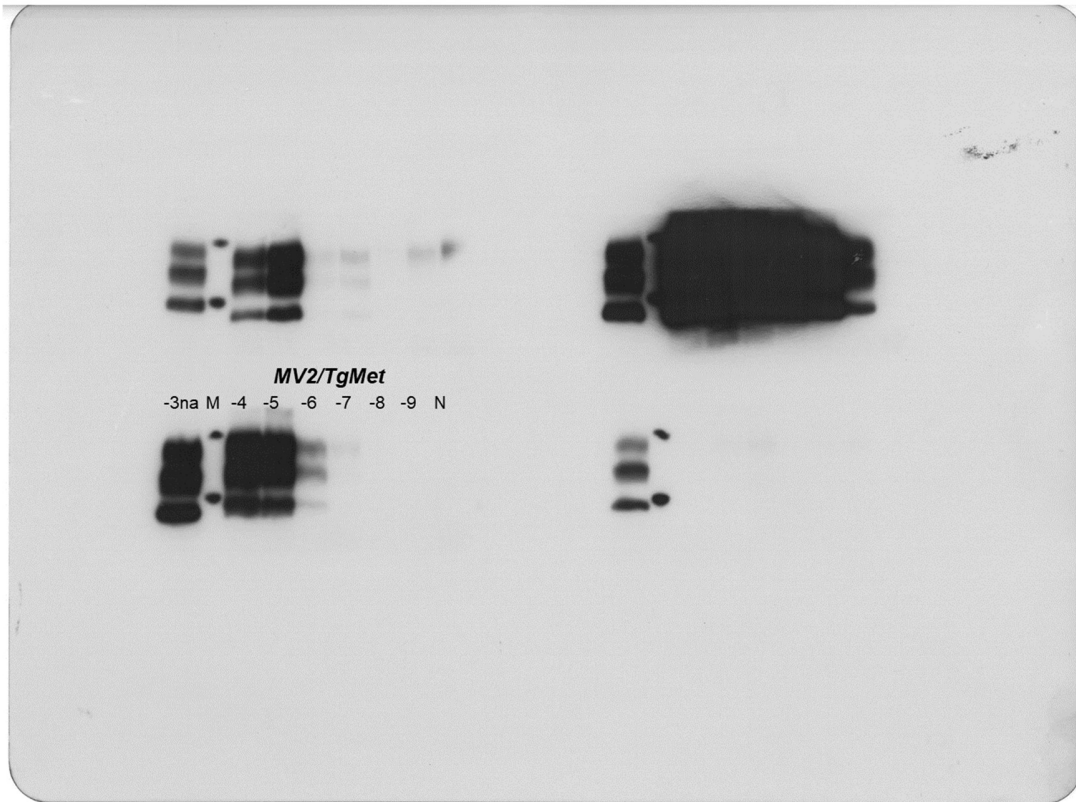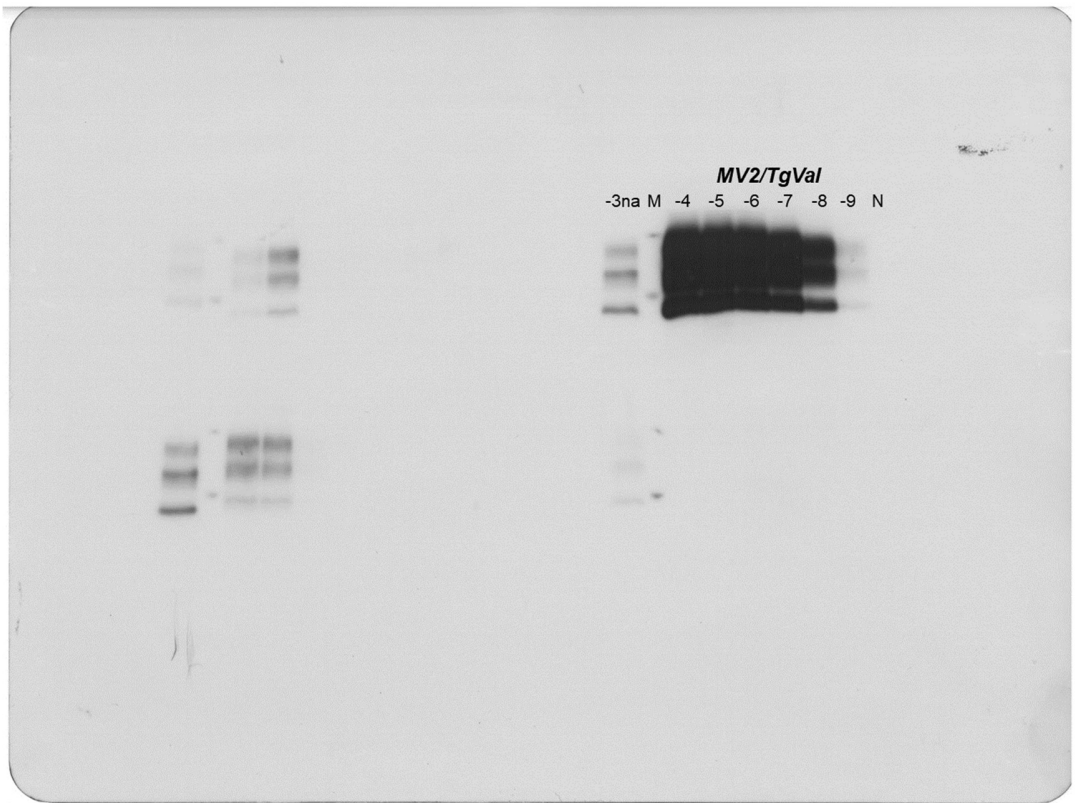

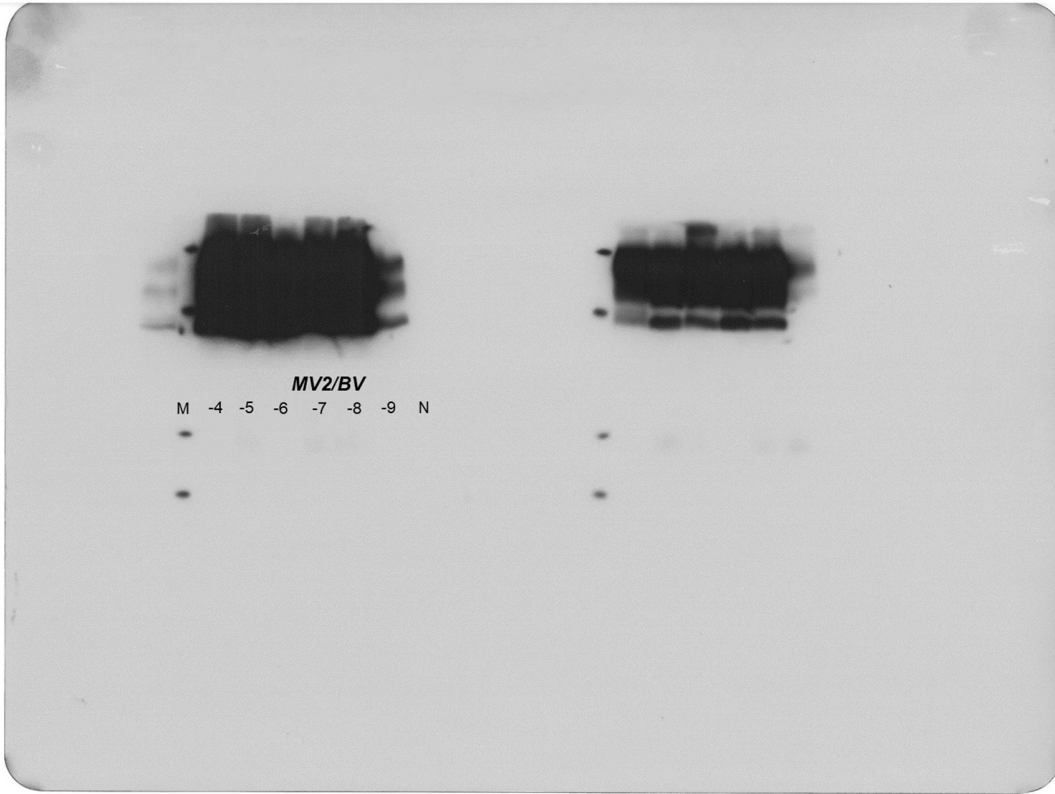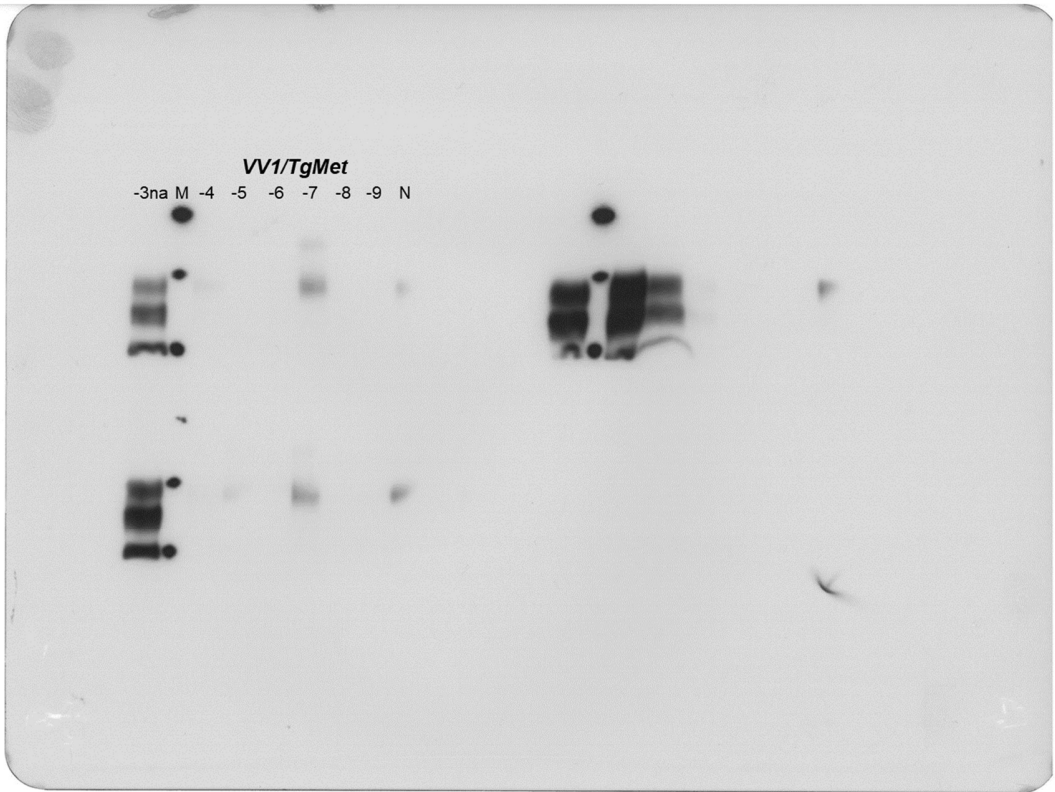

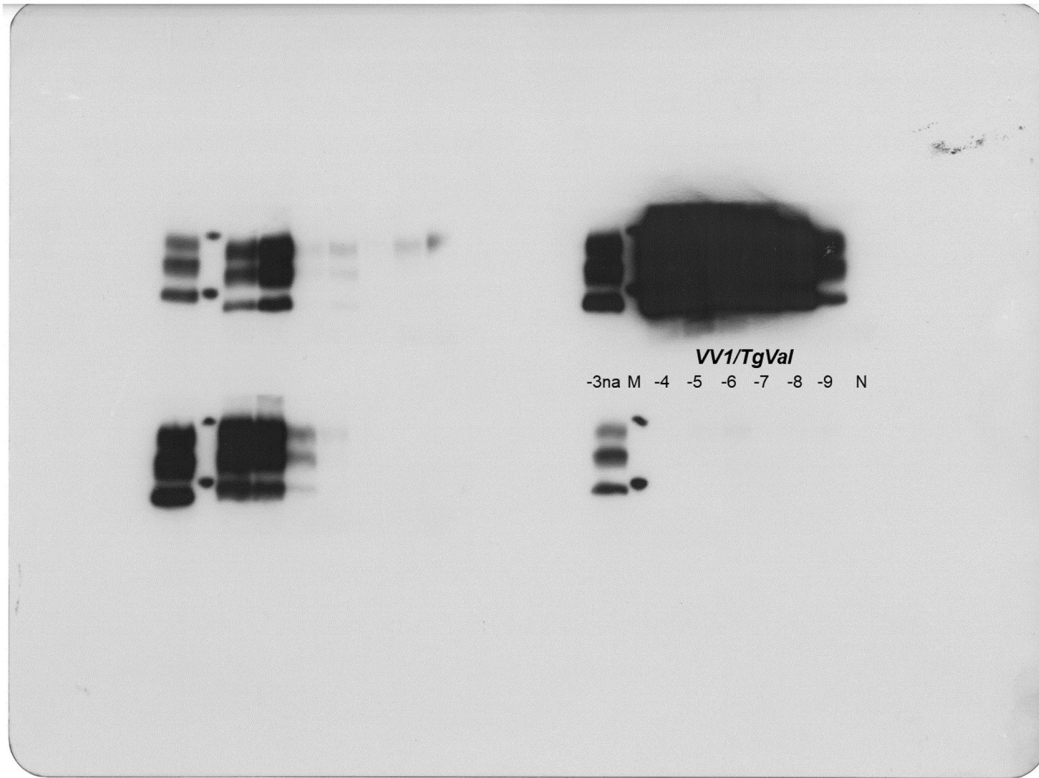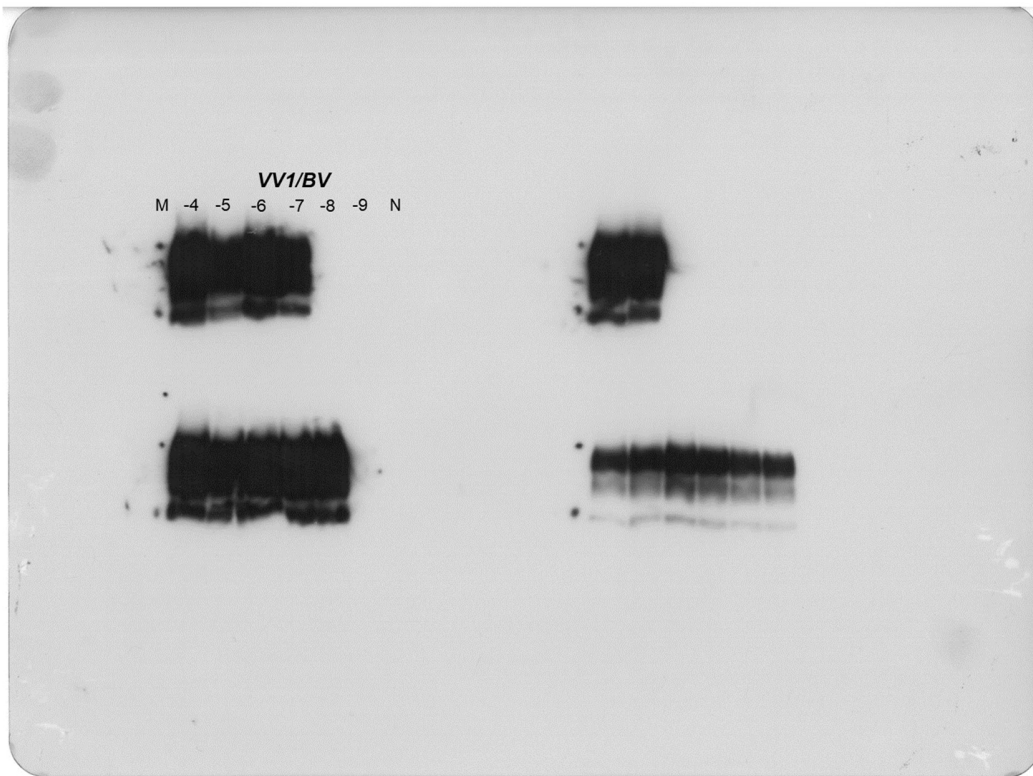

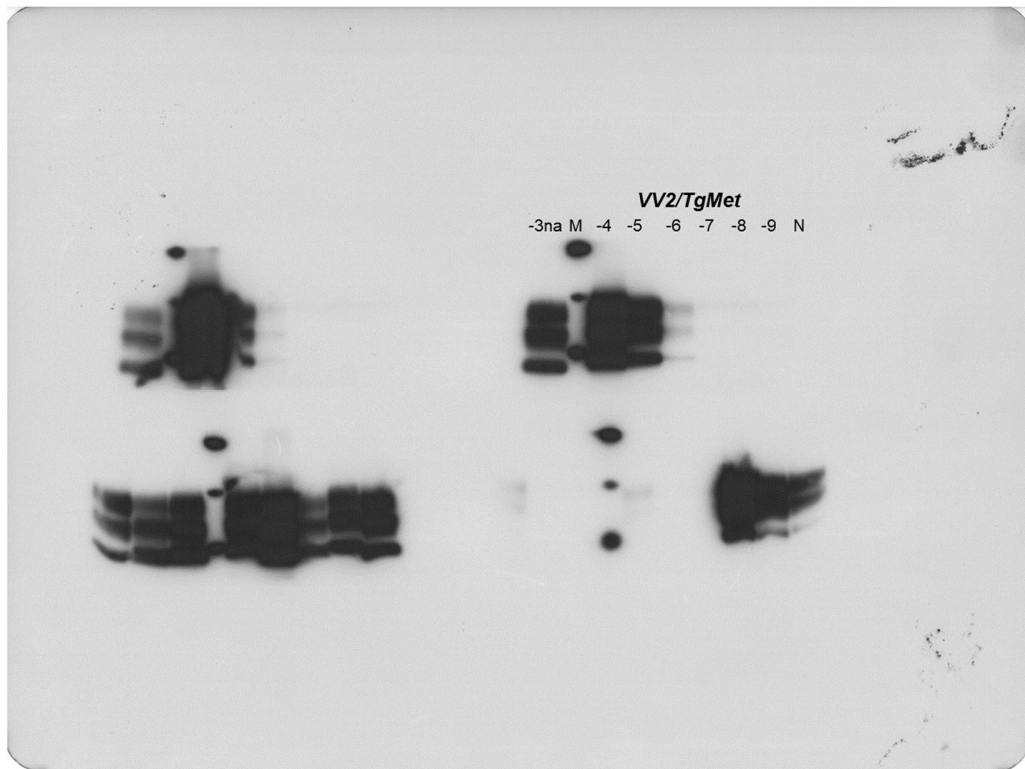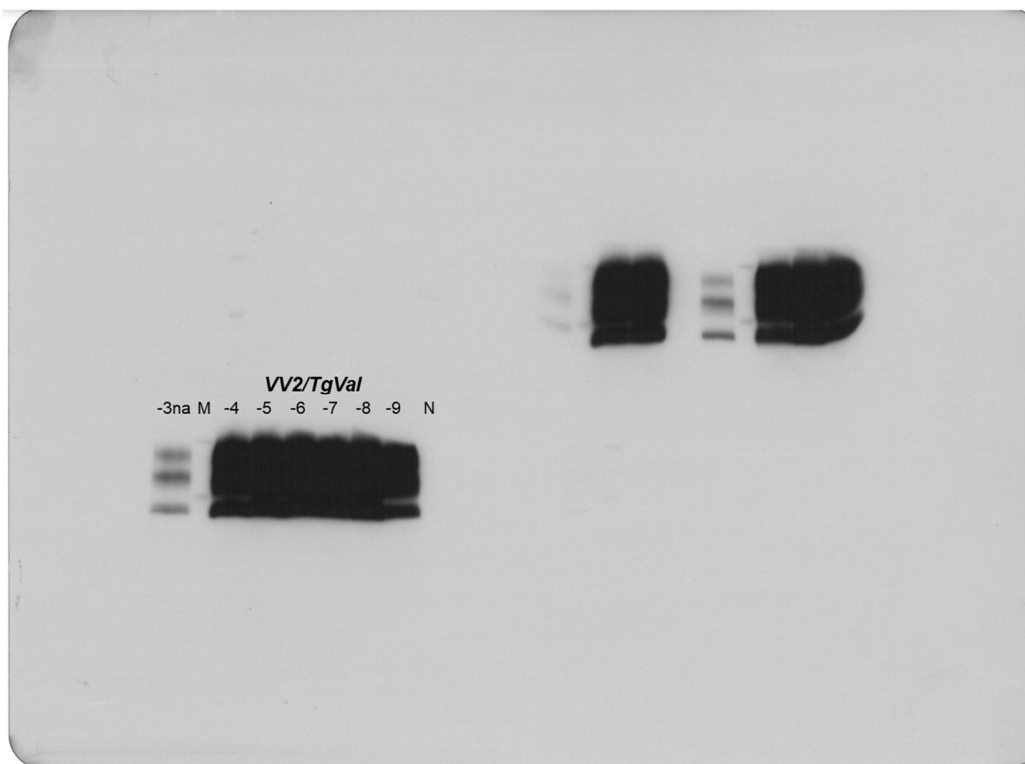

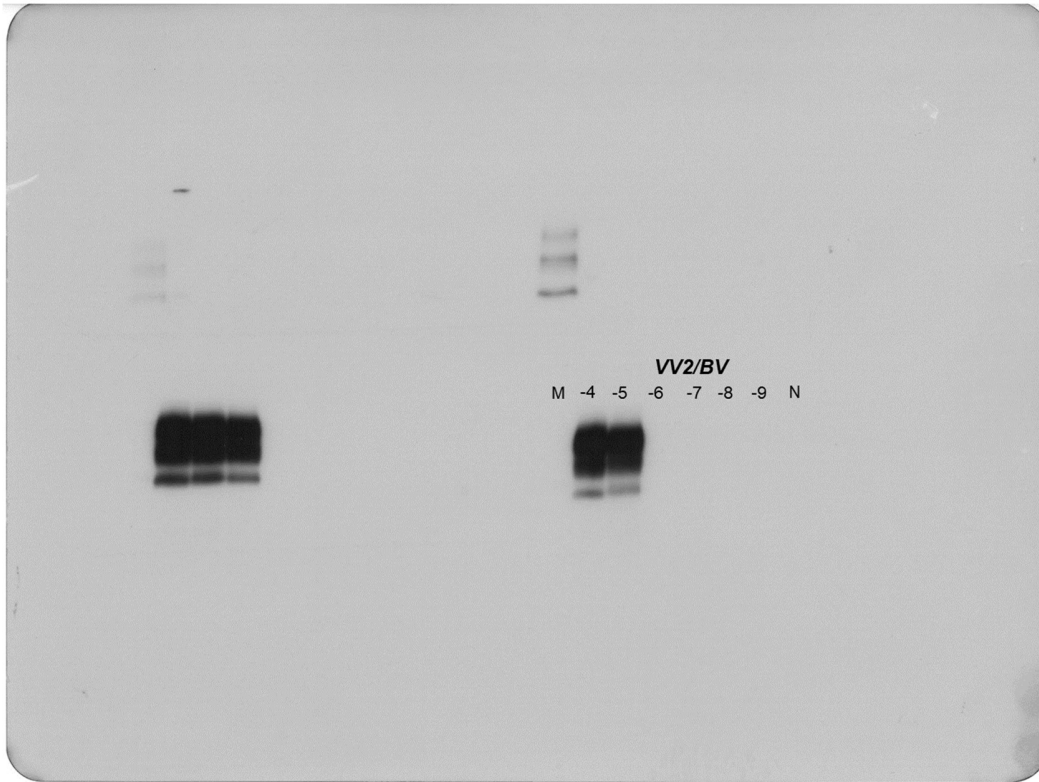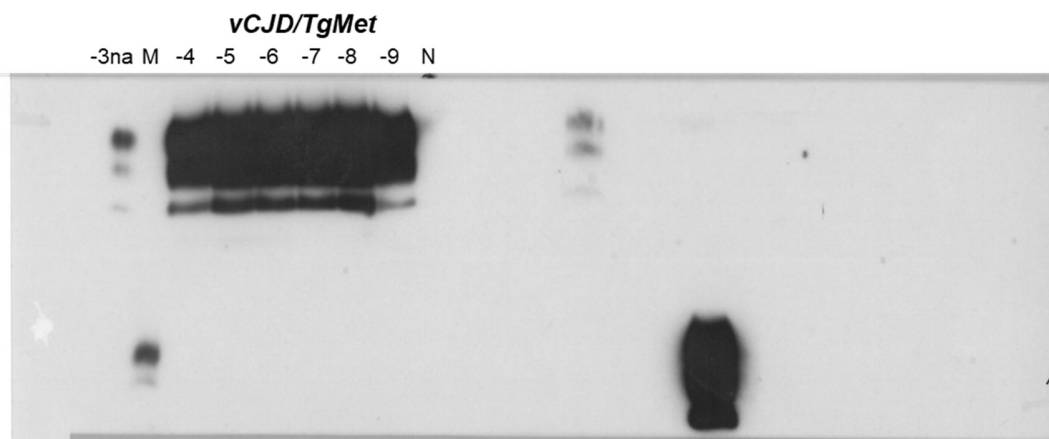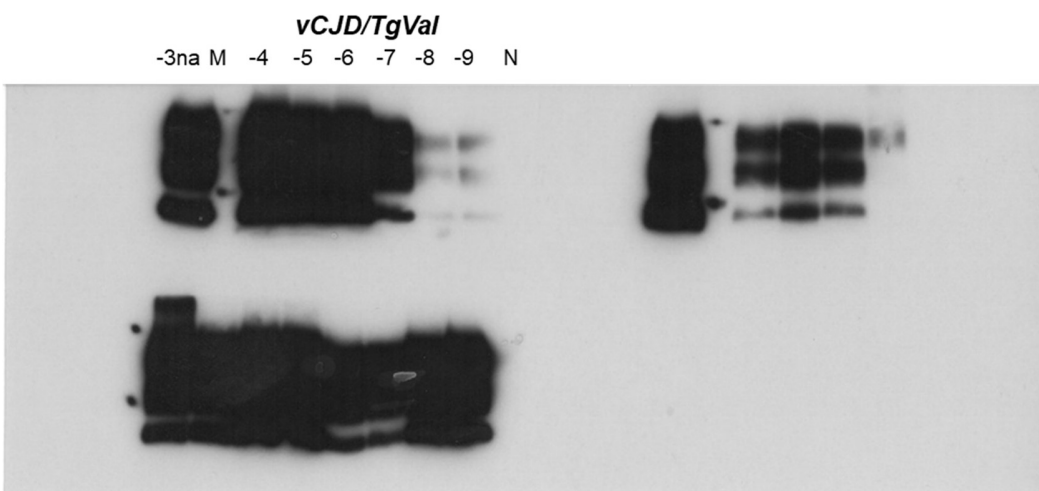

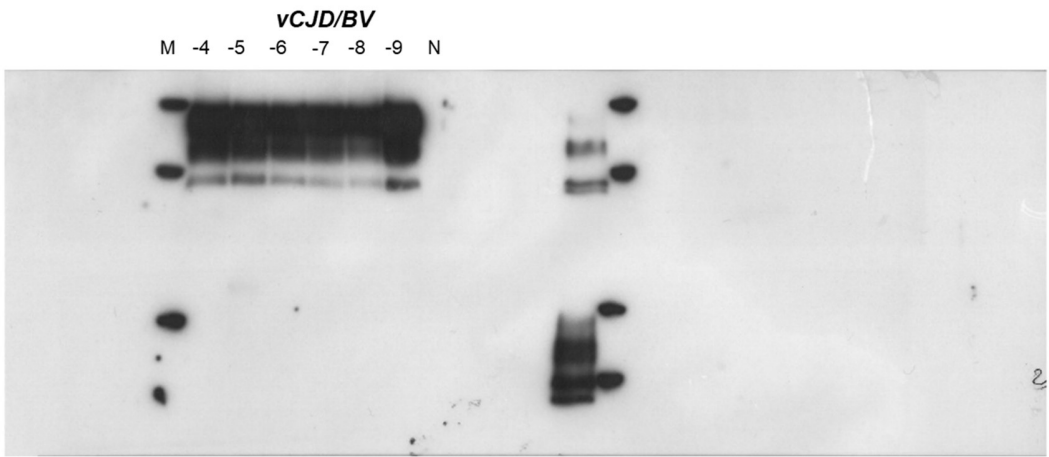

**Figure 3a**

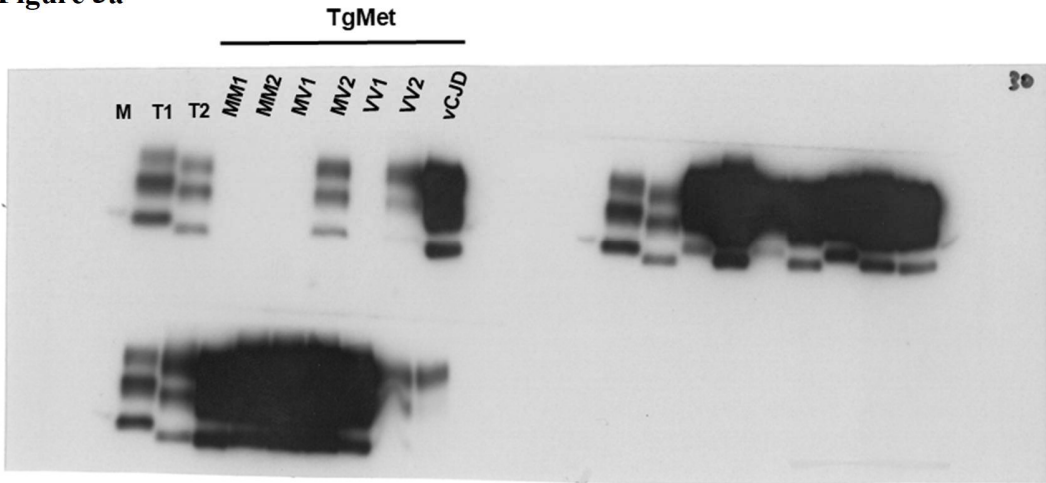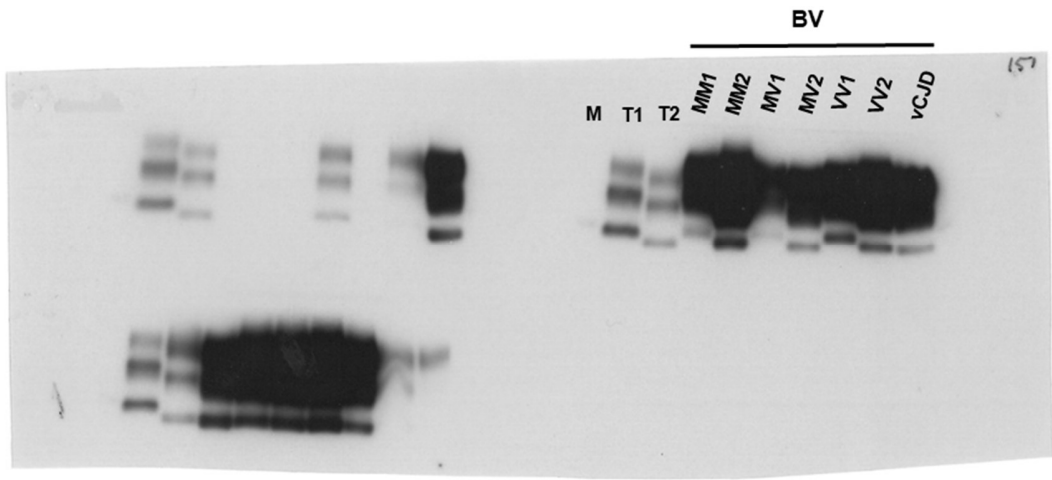

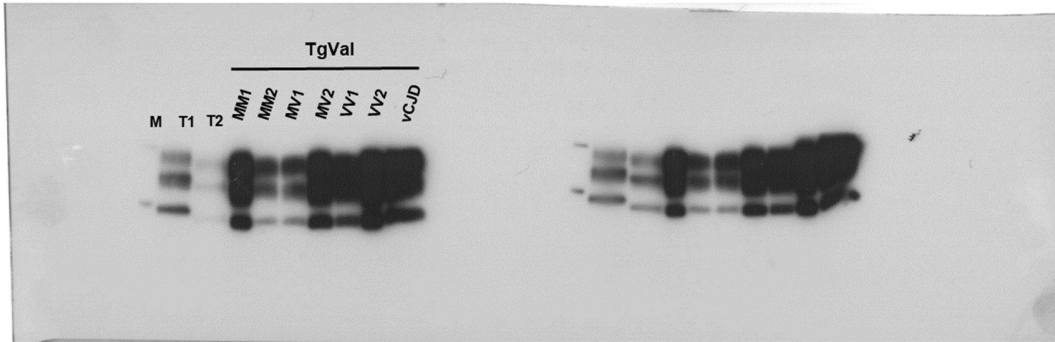

**Figure 3b**

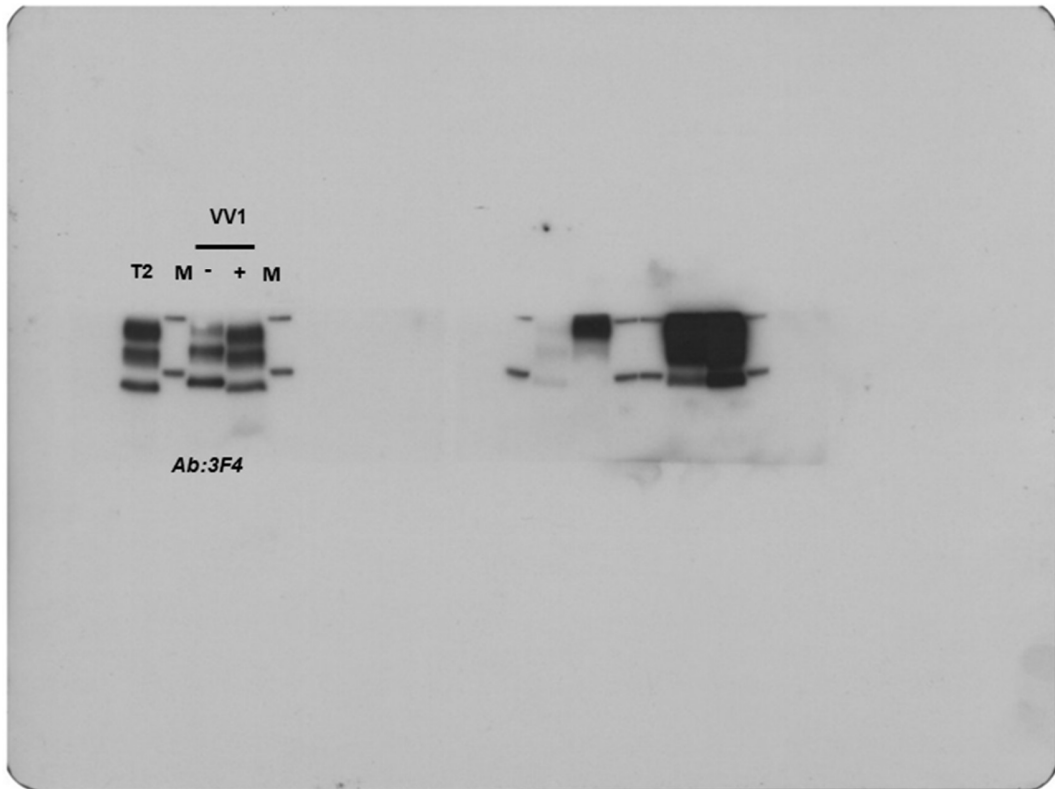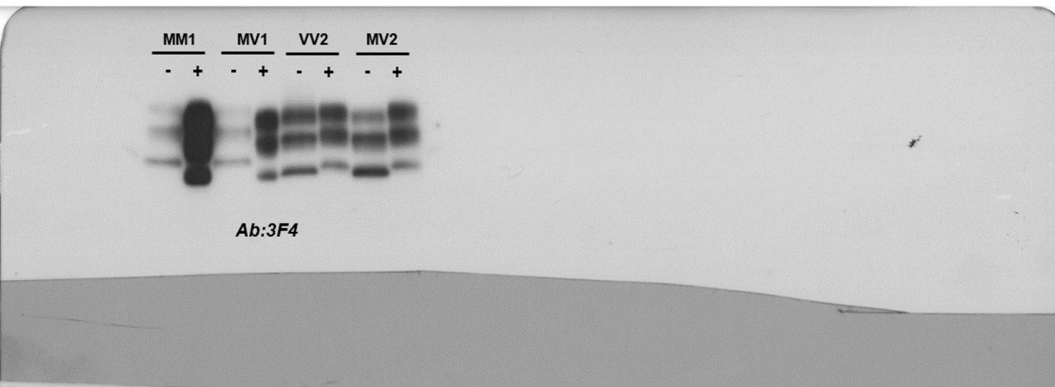



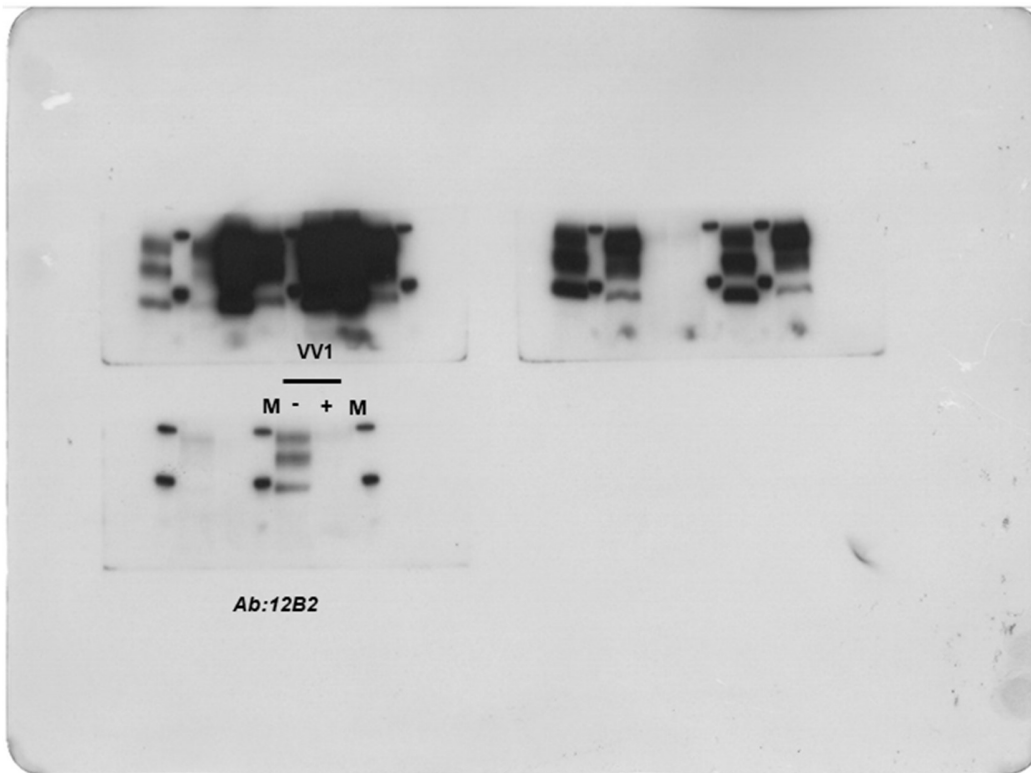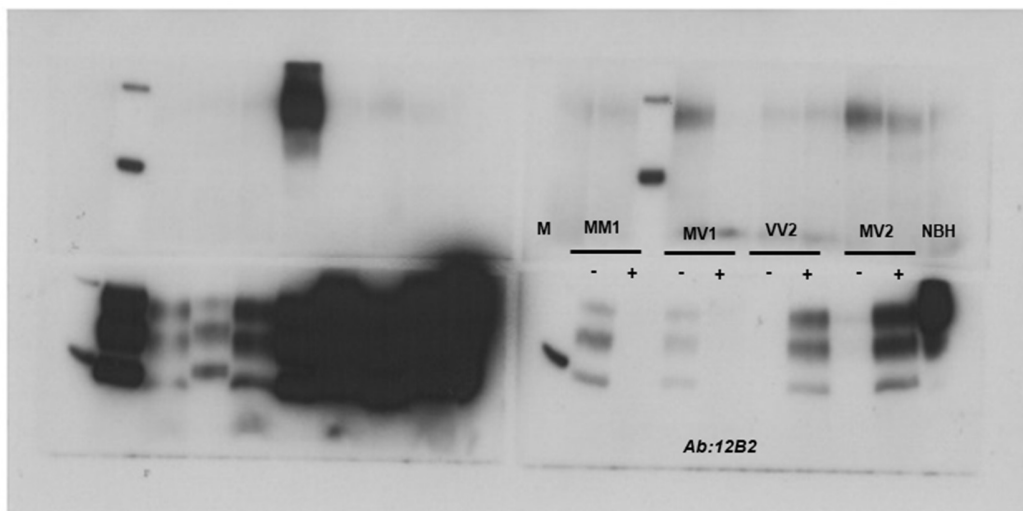

Figure 3c (digital imaging system)

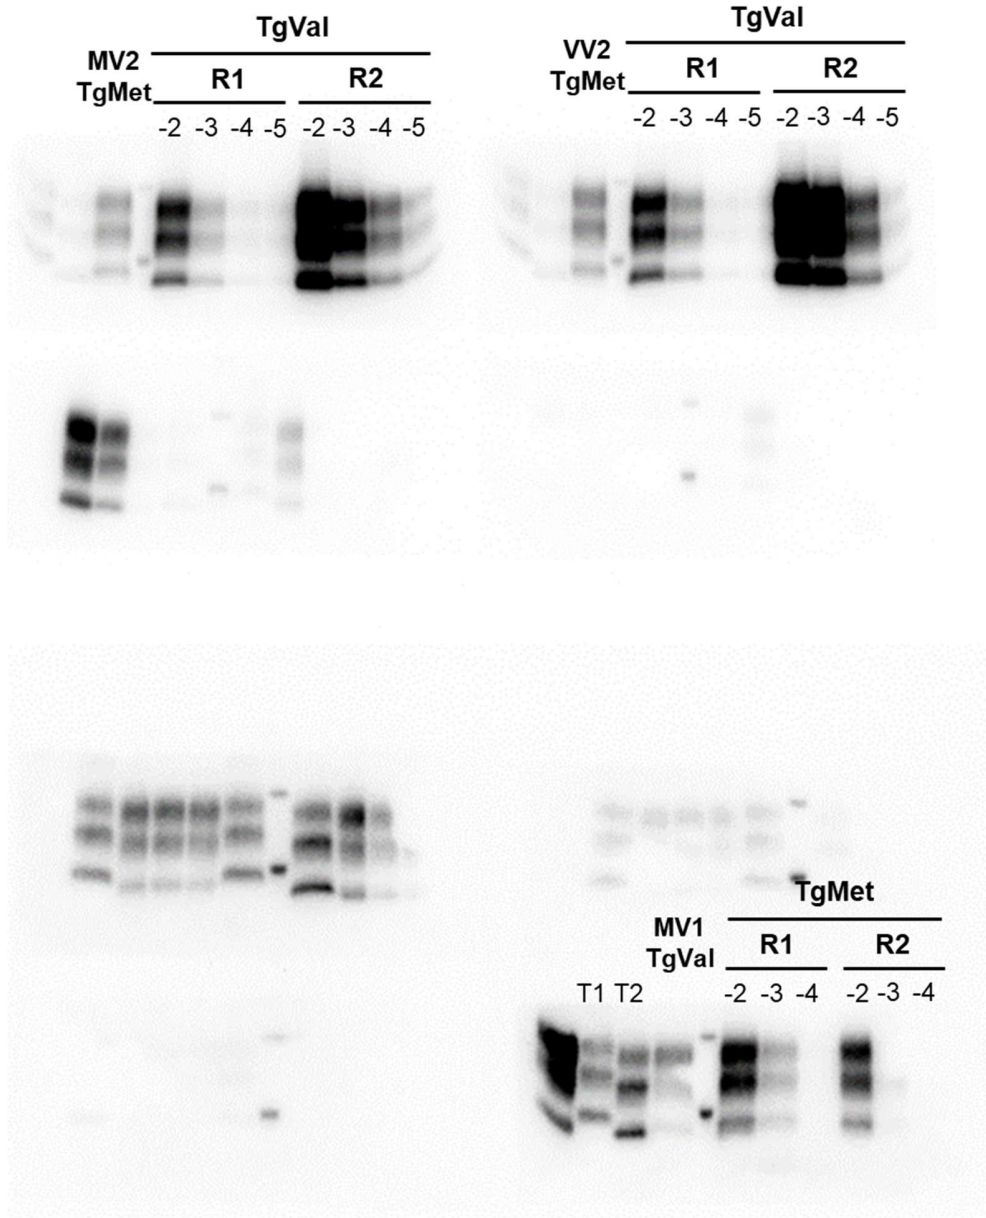

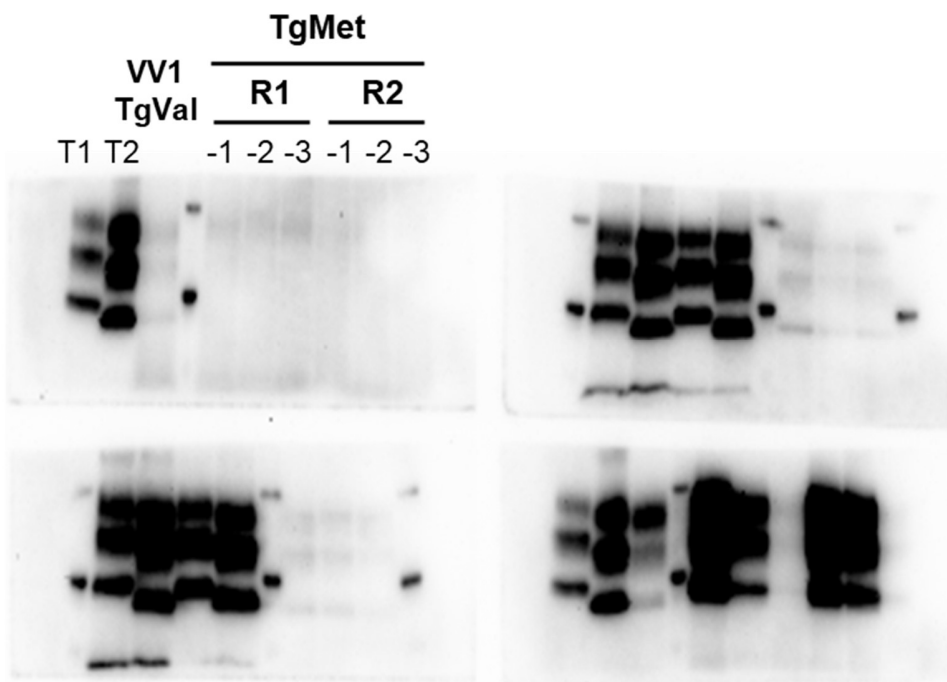

Figure 4

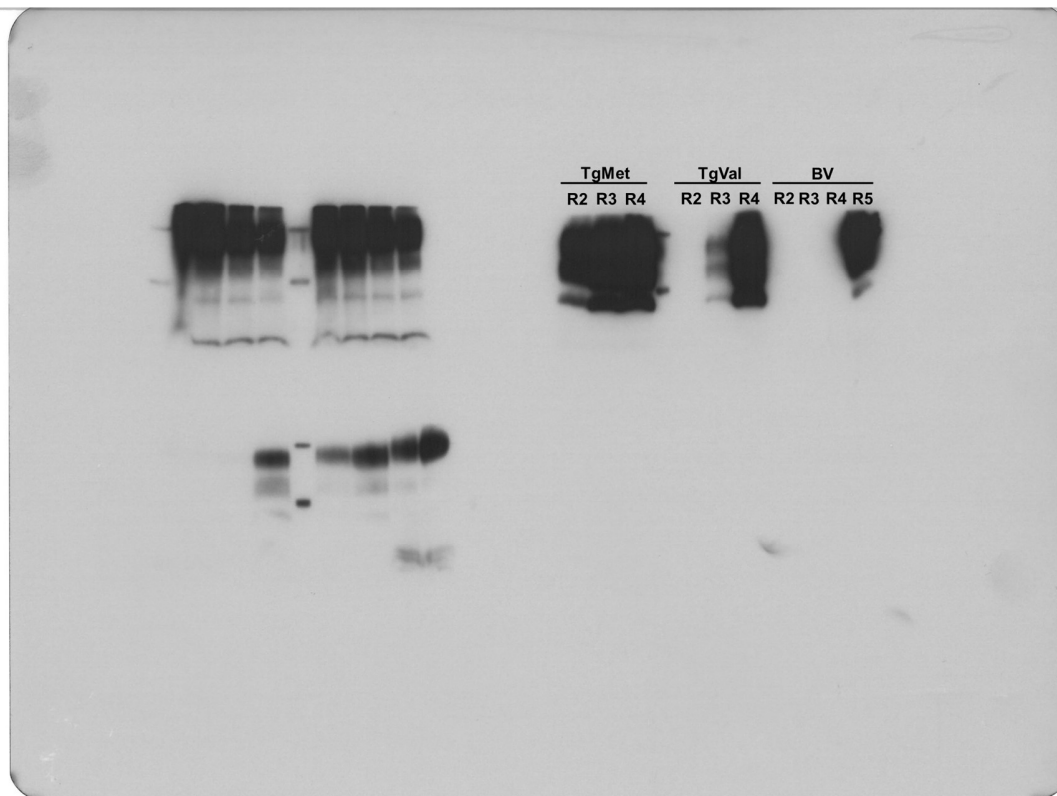

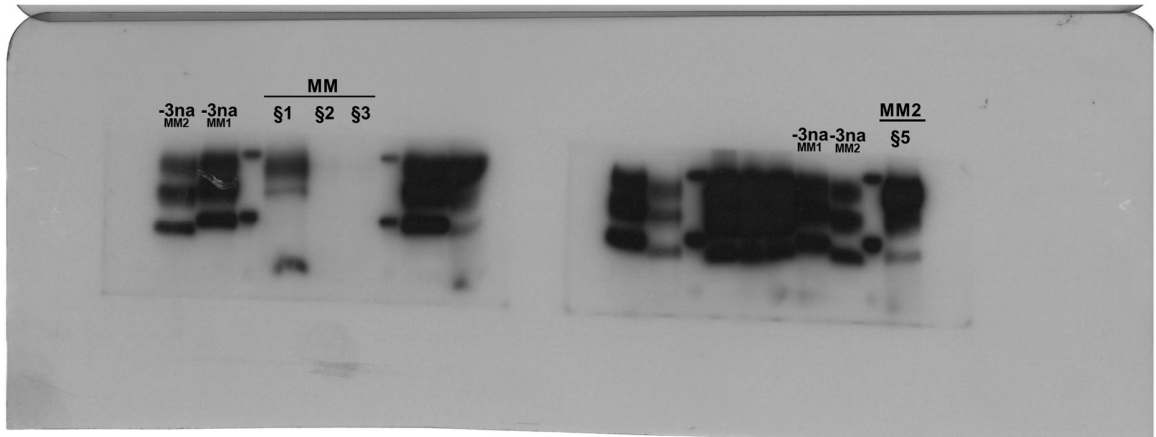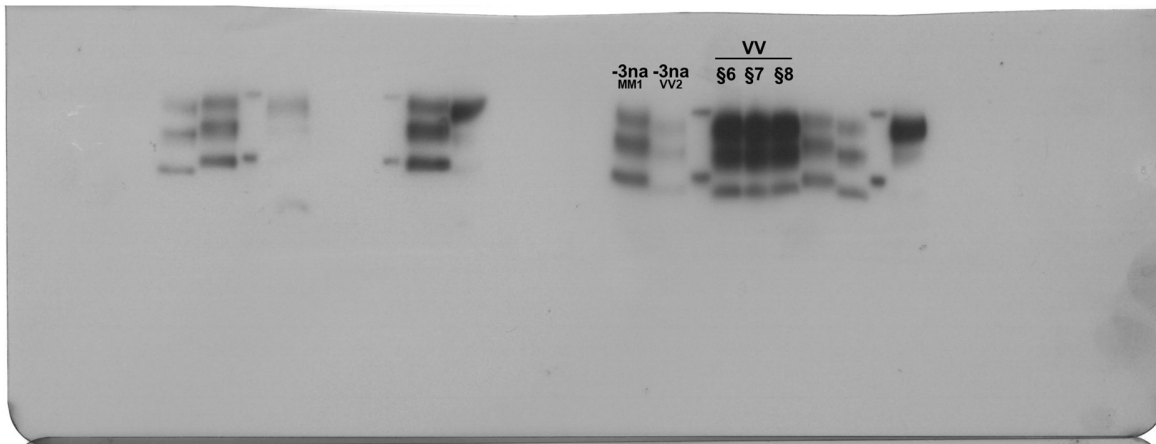

Figure S1

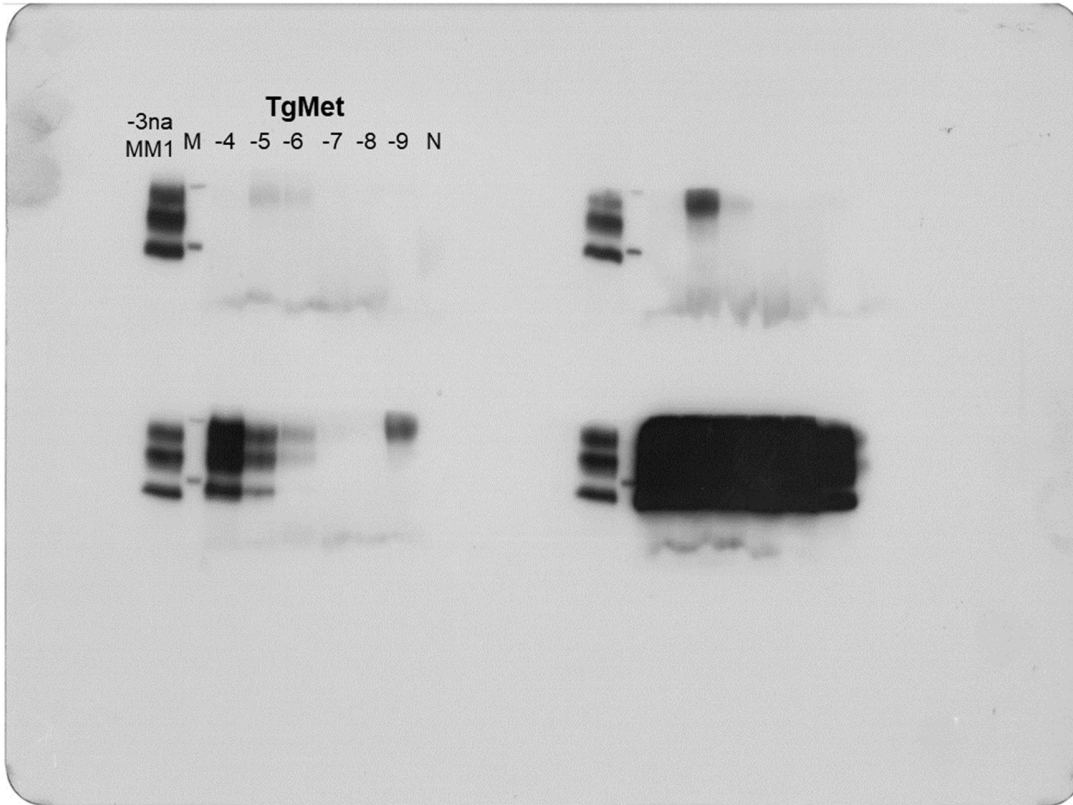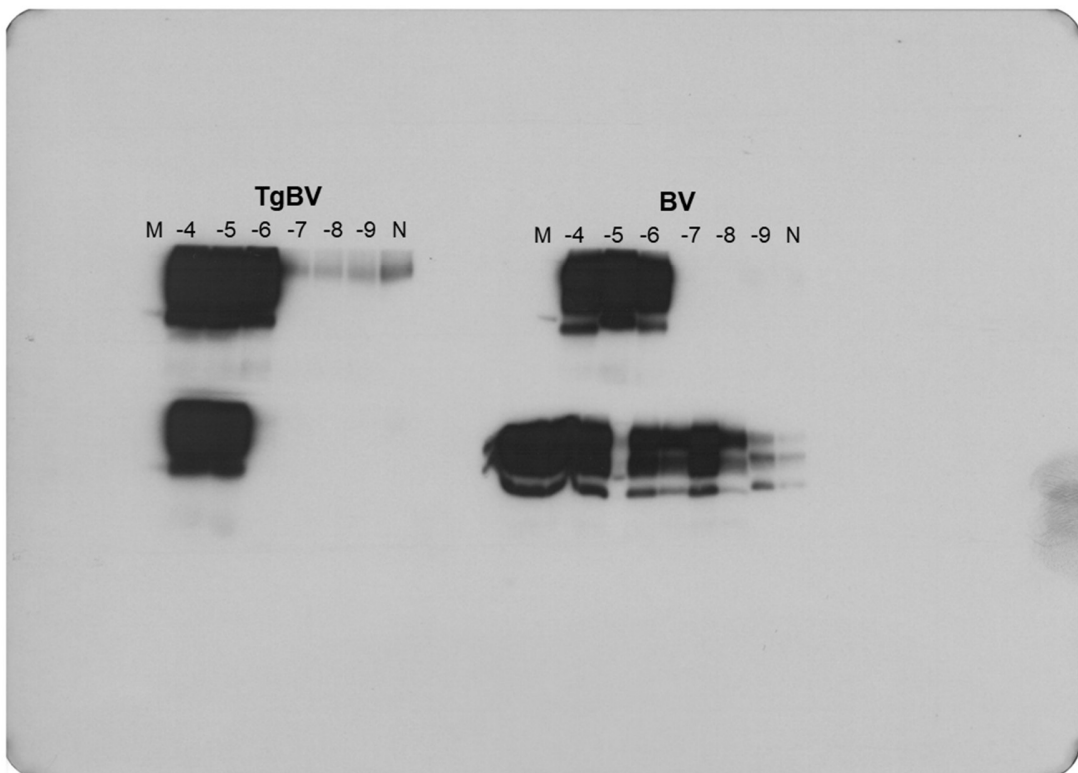

Supplement: 41598_2021_83630_MOESM1_ESM.pdf [file 41598_2021_83630_MOESM1_ESM.pdf]
